# Supplementary material for: Association Between Acupoint Selection, Target Symptoms, and Traditional Chinese Medicine Diagnosis in Real-Time Clinical Practice in a Comprehensive Cancer Center
Source: PubMed Central journal article supplement — Integr Cancer Ther. 2020 Jun 8;19:1534735420928490. doi: 10.1177/1534735420928490 (PMC7287401; doi:10.1177/1534735420928490), 2020-06-08
Supplement: Supplemental_data.pdf [file Supplemental_data.pdf]

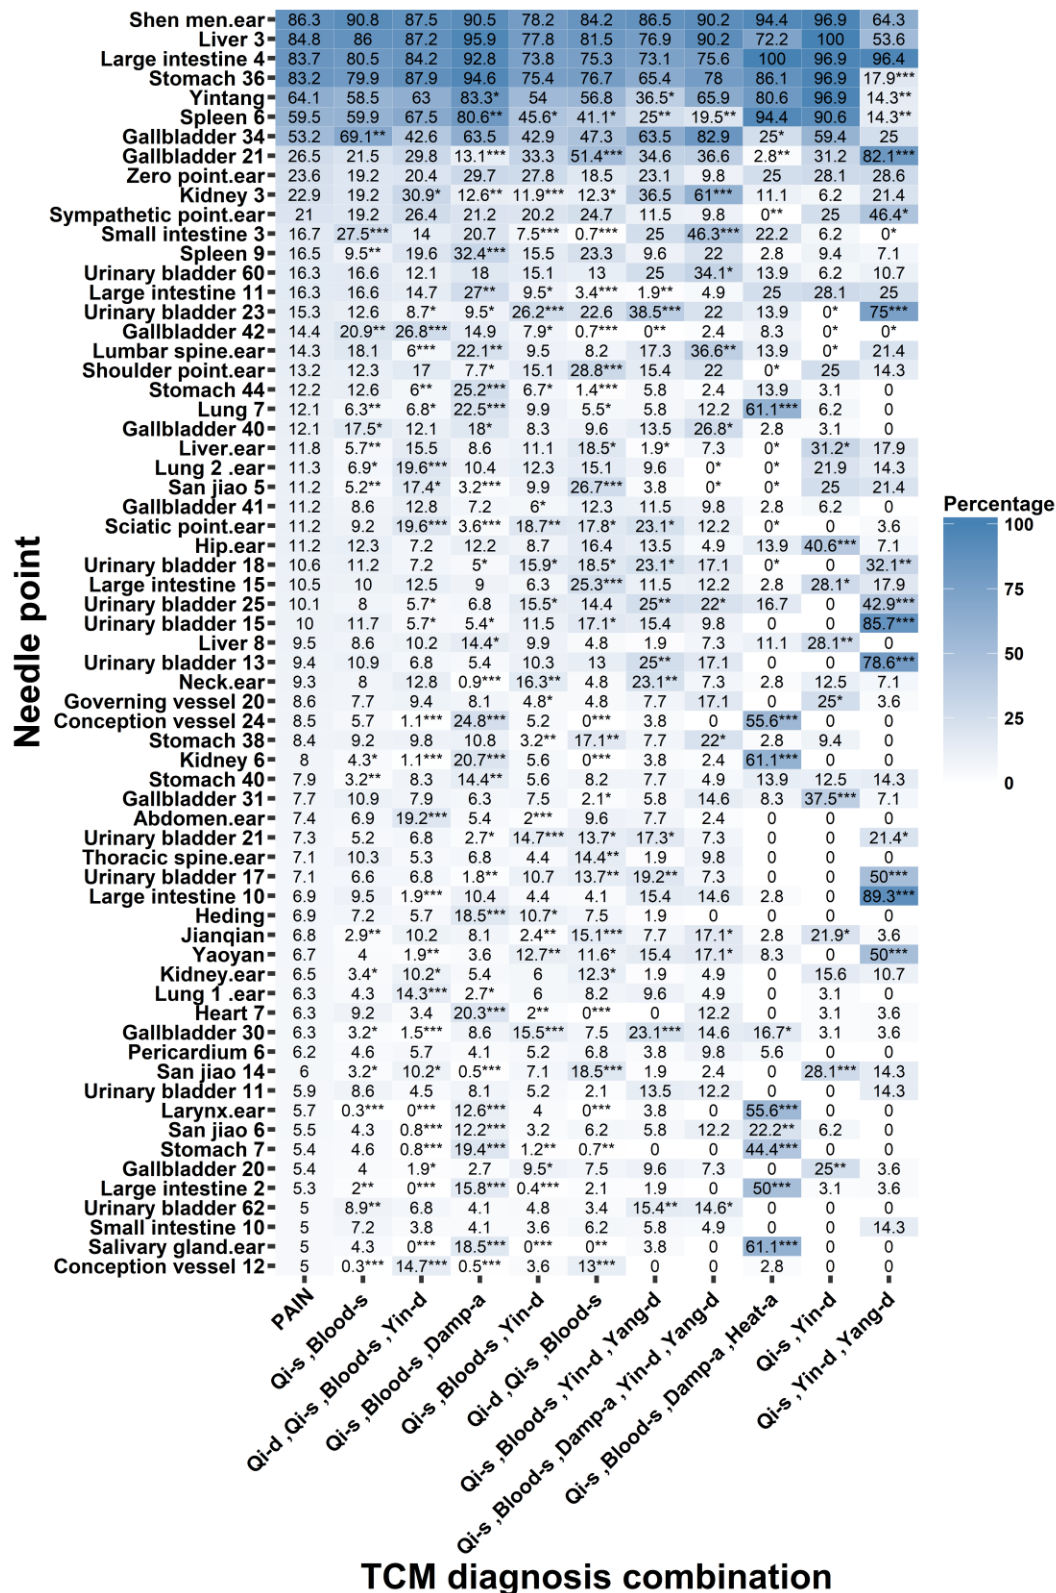

Figure S2. Heat map for acupoint selection and TCM diagnosis in pain

Abbreviations: Qi-d, Qi deficiency; Qi-s, Qi stagnation; Blood-s, Blood stagnation; Yin-d, Yin deficiency; Damp-a, Damp accumulation; Heat-a, Heat accumulation.

\* =  $p < 0.05$ ; \*\* =  $p < 0.01$ ; \*\*\* =  $p < 0.001$



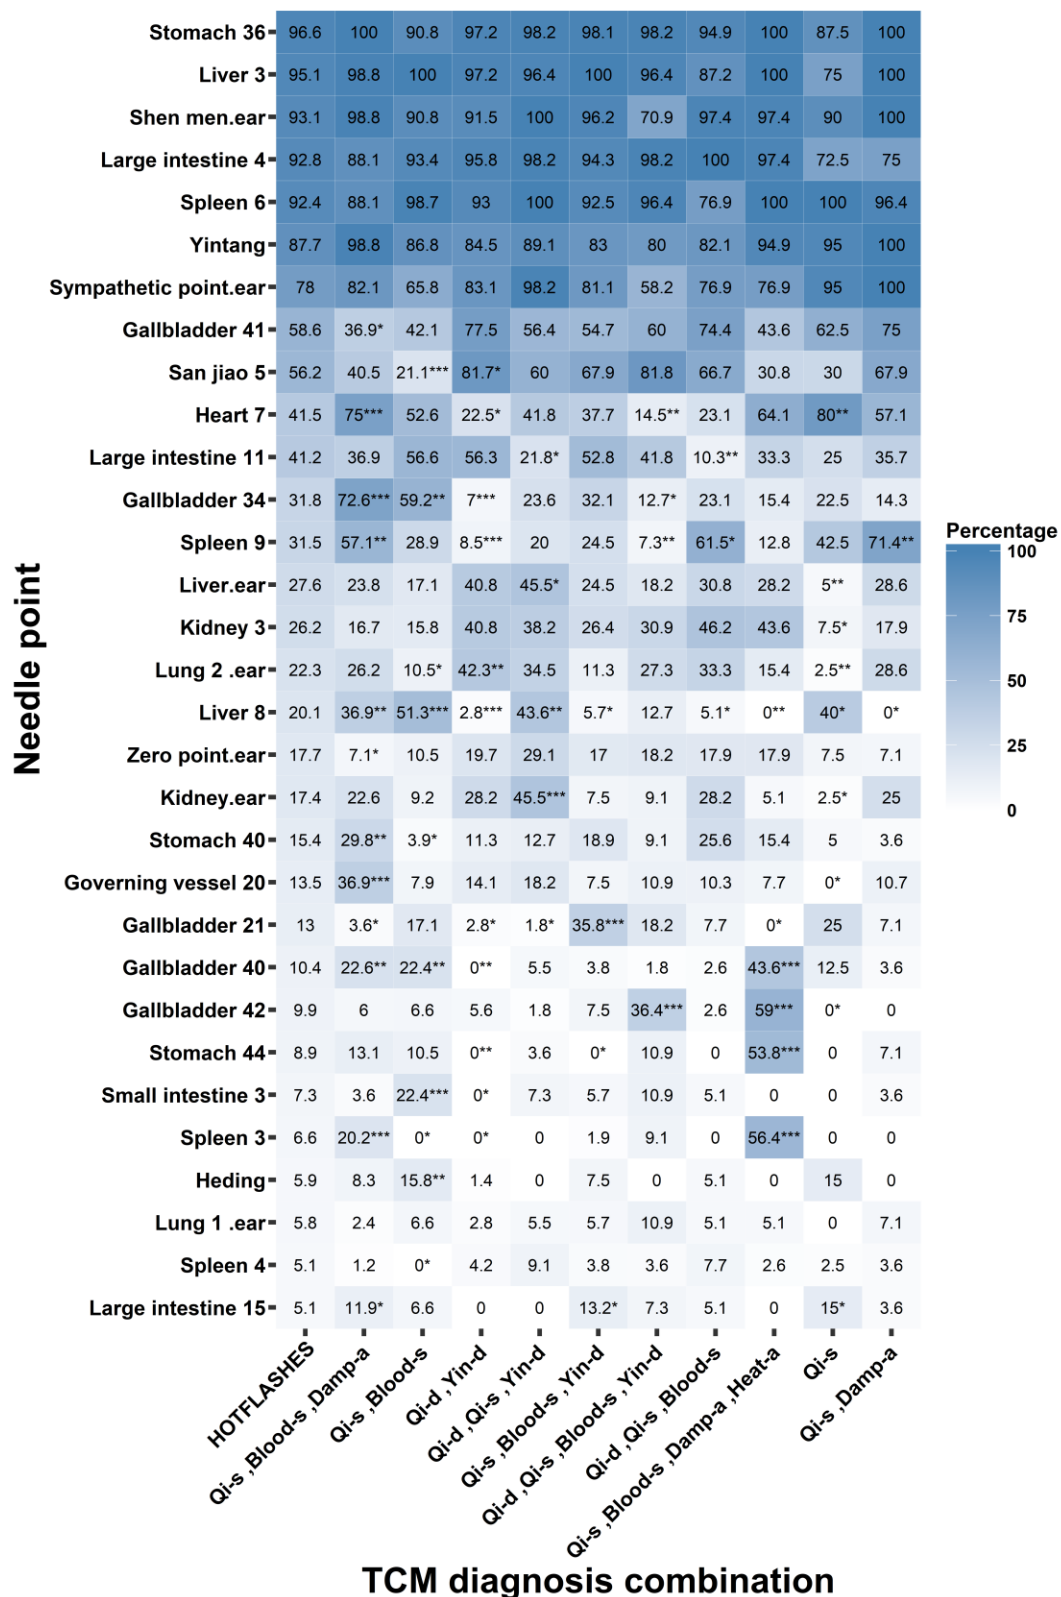

Figure S4. Heat map for acupoint selection and TCM diagnosis in hot flashes

Abbreviations: Qi-d, Qi deficiency; Qi-s, Qi stagnation; Blood-s, Blood stagnation; Yin-d, Yin deficiency; Damp-a, Damp accumulation; Heat-a, Heat accumulation.

\* =  $p < 0.05$ ; \*\* =  $p < 0.01$ ; \*\*\* =  $p < 0.001$





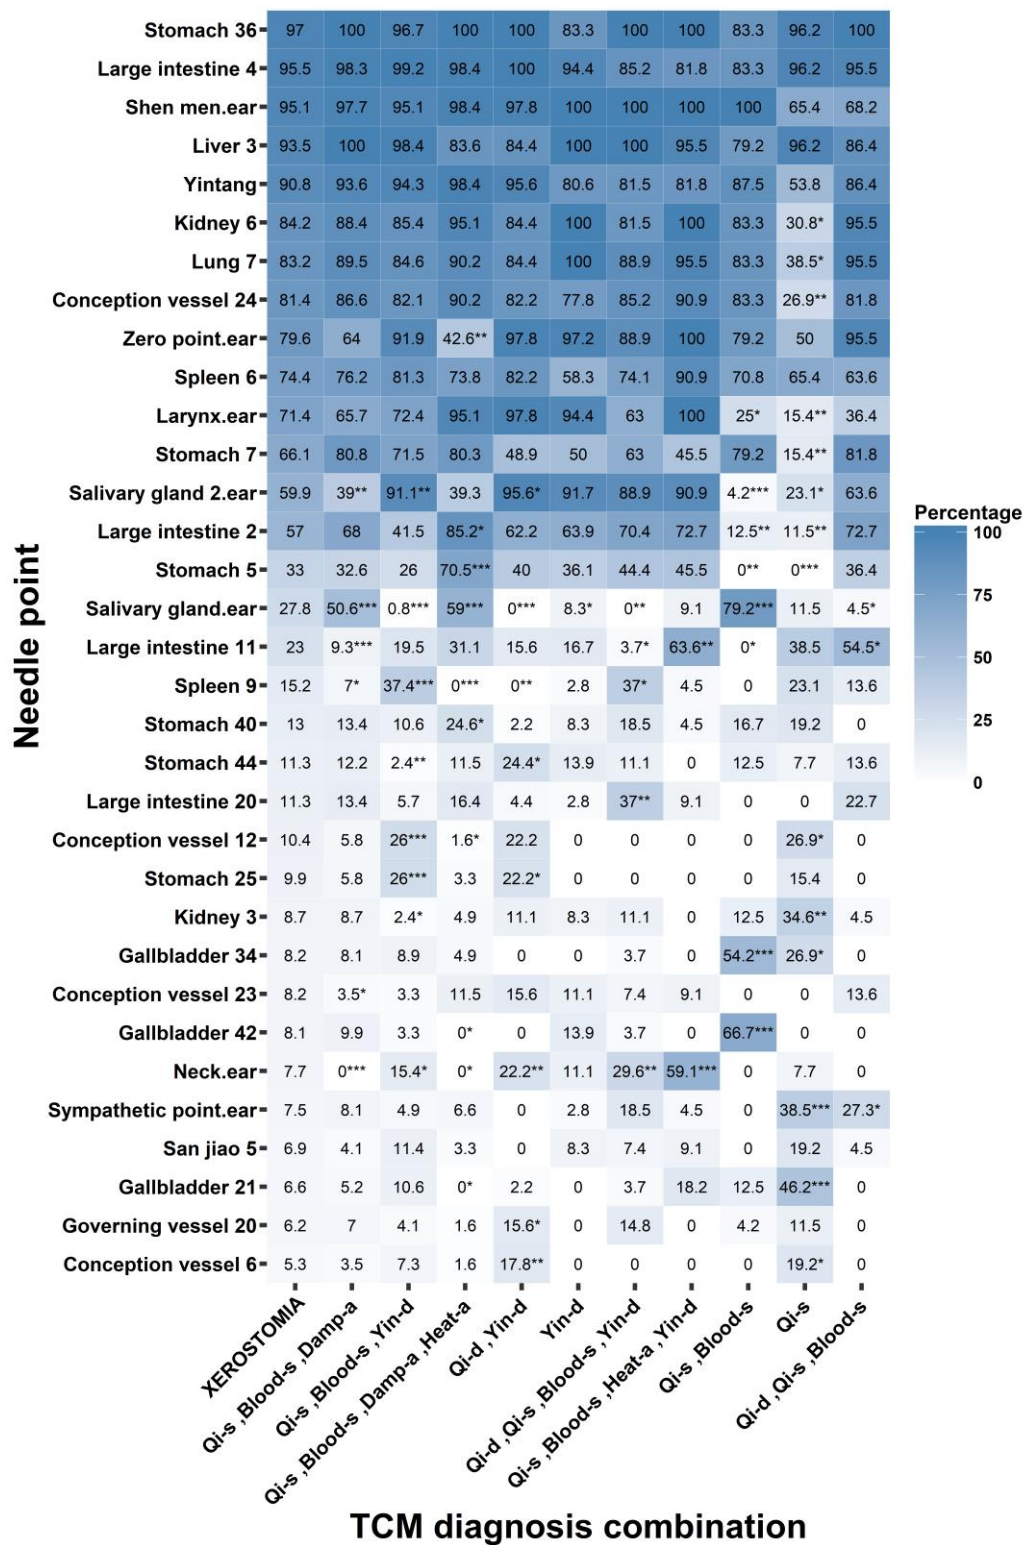

Figure S6. Heat map of acupoint selection and TCM diagnosis in Xerostomia

Abbreviations: Qi-d, Qi deficiency; Qi-s, Qi stagnation; Blood-s, Blood stagnation; Yin-d, Yin deficiency; Damp-a, Damp accumulation; Heat-a, Heat accumulation.

\* =  $p < 0.05$ ; \*\* =  $p < 0.01$ ; \*\*\* =  $p < 0.001$
